# Supplementary material for: Arterial Stiffness Is Associated With Cytomegalovirus‐Specific Senescent CD8+ T Cells
Source: PubMed Central journal article supplement — J Am Heart Assoc. 2017 Aug 28;6(9):e006535. doi: 10.1161/JAHA.117.006535 (PMC5634298; doi:10.1161/jaha.117.006535), 2017-08-28

# **SUPPLEMENTAL MATERIAL**

**Table S1. Summary of the medications taken by the study population (n=415)**

| Types of medication | N (%)       |
|---------------------|-------------|
| Antihypertensive    | 293 (70.6%) |
| Hypoglycemic        | 67 (16.1%)  |
| Lipid-lowering      | 272 (65.5%) |
| Antiplatelet        | 262 (63.1%) |
| Anticoagulation     | 66 (15.9%)  |
| Antiarrhythmic      | 56 (13.5%)  |

**Figure S1.** Representative flow cytometry plots are presented for IFN- $\gamma$  and TNF- $\alpha$  secretion and for CD107a staining in the CD8<sup>+</sup> T cell populations with or without stimulation with CMV pp65 overlapping peptides.

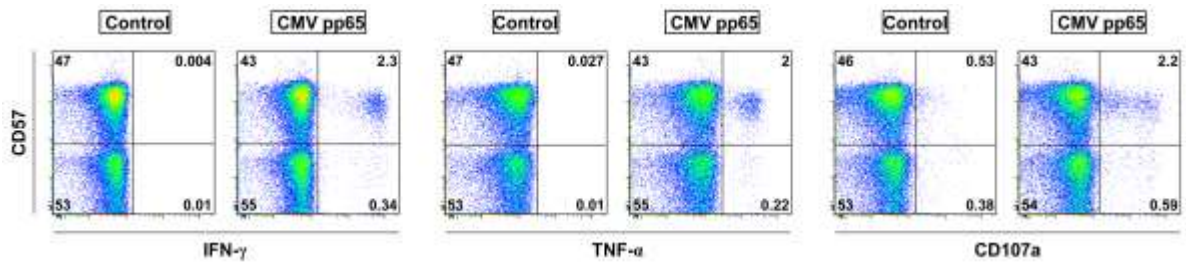

Supplement: JAH3-6-e006535-s001.pdf [file JAH3-6-e006535-s001.pdf]
